# Supplementary material for: Upregulation of YKL-40 Promotes Metastatic Phenotype and Correlates with Poor Prognosis and Therapy Response in Patients with Colorectal Cancer
Source: MDPI journal article supplement (doi:10.3390/cells11223568), 2022-11-11
Supplement: s1 [file s1]

**Supplementary Table S4 - Patient characteristics in 6 cohorts analysed.**

|                              | <b>Cohort 1</b><br><b>GSE14333</b><br><b>(N=226)</b> | <b>Cohort 2</b><br><b>GSE37892</b><br><b>(N=130)</b> | <b>Cohort 3</b><br><b>GSE41258</b><br><b>(N=128)</b> | <b>Cohort 4</b><br><b>GSE40967</b><br><b>(N=585)</b> | <b>Cohort 5</b><br><b>GSE5851</b><br><b>(N=80)</b> | <b>Cohort 6</b><br><b>TCGA</b><br><b>(N=387)</b> |
|------------------------------|------------------------------------------------------|------------------------------------------------------|------------------------------------------------------|------------------------------------------------------|----------------------------------------------------|--------------------------------------------------|
| <b>Gender</b>                |                                                      |                                                      |                                                      |                                                      |                                                    |                                                  |
| Female                       | 106 (46.9%)                                          | 61 (46.92%)                                          | 63 (49.6%)                                           | 263 (45%)                                            | 36 (45%)                                           | 179 (45.3%)                                      |
| Male                         | 120 (53.1%)                                          | 69 (53.08%)                                          | 65 (50.4%)                                           | 322 (55%)                                            | 44 (55%)                                           | 208 (53.7%)                                      |
| <b>Age, years</b>            |                                                      |                                                      |                                                      |                                                      |                                                    |                                                  |
| Median (range)               | 67 (26-92)                                           | 68 (22-97)                                           | 65.7 (23-87)                                         | 69 (22-97)                                           | 60.5 (25-89)                                       | 69 (31-90)                                       |
| <b>Location</b>              |                                                      |                                                      |                                                      |                                                      |                                                    |                                                  |
| Proximal                     | 101 (44.69%)                                         | 57 (43.85%)                                          | 52 (40%)                                             | 232 (39.7%)                                          | NA                                                 | 207 (53.5%)                                      |
| Distal                       | 93 (41.5%)                                           | 72 (55.38%)                                          | 66 (52%)                                             | 351 (60%)                                            | NA                                                 | 163 (42.1%)                                      |
| Rectum                       | 30 (13.27%)                                          | 0 (0%)                                               | 10 (8%)                                              | 0 (0%)                                               | NA                                                 | 1 (0.3%)                                         |
| Unknown                      | 2 (0.88%)                                            | 1 (0.78%)                                            | 0 (0%)                                               | 2 (0.3%)                                             | NA                                                 | 16 (4.1%)                                        |
| <b>Stage</b>                 |                                                      |                                                      |                                                      |                                                      |                                                    |                                                  |
| <b>0</b>                     | 0 (0%)                                               | 0 (0%)                                               | 0 (0%)                                               | 4 (0.7%)                                             | 0 (0%)                                             | 0 (0%)                                           |
| <b>I</b>                     | 41 (18.14%)                                          | 0 (0%)                                               | 28 (22.4%)                                           | 38 (6.5%)                                            | 0 (0%)                                             | 64 (16.5%)                                       |
| <b>II</b>                    | 94 (41.59%)                                          | 73 (56.15%)                                          | 51 (39.8%)                                           | 271 (46.3%)                                          | 0 (0%)                                             | 151 (39%)                                        |
| <b>III</b>                   | 91 (40.27%)                                          | 57 (43.85%)                                          | 49 (38.3%)                                           | 210 (35.9%)                                          | 0 (0%)                                             | 104 (26.9%)                                      |
| <b>IV</b>                    | 0 (0%)                                               | 0 (0%)                                               | 0 (0%)                                               | 60 (10.3%)                                           | 80 (100%)                                          | 57 (14.8%)                                       |
| Unknown                      | 0 (0%)                                               | 0 (0%)                                               | 0 (0%)                                               | 2 (0.3%)                                             | 0 (0%)                                             | 11 (2.8%)                                        |
| <b>Adjuvant chemotherapy</b> |                                                      |                                                      |                                                      |                                                      |                                                    |                                                  |
| Done                         | 87 (38.5%)                                           | NA                                                   | NA                                                   | 240 (41%)                                            | 80 (100%)                                          | 1 (0.3%)                                         |
| Undone                       | 139 (61.5%)                                          | NA                                                   | NA                                                   | 326 (55.7%)                                          | NA                                                 | 386 (99.7%)                                      |
| Unknown                      | 0 (0%)                                               | NA                                                   | NA                                                   | 19 (3.3%)                                            | NA                                                 | 0 (0%)                                           |
| <b>KRAS status</b>           |                                                      |                                                      |                                                      |                                                      |                                                    |                                                  |
| WT                           | NA                                                   | NA                                                   | NA                                                   | 328 (56.1%)                                          | 53 (66.2%)                                         | 20 (5.2%)                                        |
| Mutant                       | NA                                                   | NA                                                   | NA                                                   | 217 (37.1%)                                          | 27 (33.8%)                                         | 15 (3.8%)                                        |
| Unknown                      | NA                                                   | NA                                                   | NA                                                   | 40 (6.8%)                                            | 0 (0%)                                             | 352 (91%)                                        |
| <b>YKL-40 Expression</b>     |                                                      |                                                      |                                                      |                                                      |                                                    |                                                  |
| Low                          | 199 (88.1%)                                          | 64 (49.2%)                                           | 14 (10.9%)                                           | 524 (89.6%)                                          | 18 (22.5%)                                         | 60 (15.5%)                                       |
| High                         | 27 (11.9%)                                           | 66 (50.8%)                                           | 114 (89.1%)                                          | 61 (10.4%)                                           | 62 (77.5%)                                         | 327 (84.5%)                                      |
