# Supplementary material for: Upregulation of YKL-40 Promotes Metastatic Phenotype and Correlates with Poor Prognosis and Therapy Response in Patients with Colorectal Cancer
Source: MDPI journal article supplement (doi:10.3390/cells11223568), 2022-11-11
Supplement: s1 [file s1]

**Supplementary Table S1** – List of primers sequences used for the cleavage assay.

| Gene   | Sequence |                                 |
|--------|----------|---------------------------------|
| CHI3L1 | Fw       | 5' – CTTTGCTCACAATCTGCACCC – 3' |
|        | Rev      | 5' – CCCATTTAAGCCAAGCCCCTC – 3' |
| HPRT1  | Fw       | 5' – ACATCAGCAGCTGTTCTG – 3'    |
|        | Rev      | 5' – GGCTGAAAGGAGAGAACT – 3'    |

**Equation to calculate the cleavage efficiency**

Cleavage Efficiency=  $1 - [(1 - \text{cleaved fraction})^{1/2}]$ ; Cleaved fraction= sum of cleaved band intensities/(sum of the cleaved and parental band intensities).
