# Supplementary material for: Upregulation of YKL-40 Promotes Metastatic Phenotype and Correlates with Poor Prognosis and Therapy Response in Patients with Colorectal Cancer
Source: MDPI journal article supplement (doi:10.3390/cells11223568), 2022-11-11
Supplement: s1 [file s1]

**Supplementary Table S3\_A.** List of primers sequences used for qRT-PCR.

| Gene   | Sequence |                                     |
|--------|----------|-------------------------------------|
| CHI3L1 | Fw       | 5' – GACCACAGGCCATCACAGTCC – 3'     |
|        | Rev      | 5' – TGTACCCACAGCATAGTCAGTGT – 3'   |
| GAPDH  | Fw       | 5' – AGGTCCACCACTGACACGTTG – 3'     |
|        | Rev      | 5' – AGCTGAACGGGAAGCTCACT – 3'      |
| ACTINB | Fw       | 5' – AGTGTGACG TGGACATCCGGA – 3'    |
|        | Rev      | 5' – GCCAGGGCAGTGATCTCCTCCT – 3'    |
| UBC    | Fw       | 5' – TCCTGATCAGGCAGAGGTTGATCTT – 3' |
|        | Rev      | 5' – GACCAAGTGCAGAGTGGACTCTT – 3'   |

**Supplementary Table S3\_B –** TaqMan assays ID (Applied Biosystems).

| Gene         | Assay ID      |
|--------------|---------------|
| GAPDH        | Hs99999905_m1 |
| HPRT1        | Hs01003267_m1 |
| CHI3L1       | Hs00609691_m1 |
| CDH1 (E-CAD) | Hs01023895_m1 |
| CDH2 (N-CAD) | Hs00983062_m1 |
| SNAI1        | Hs00195591_m1 |
| TWIST1       | Hs00361186_m1 |
| VIM          | Hs00185584_m1 |
| ZEB1         | Hs00611018_m1 |
