# Supplementary material for: Upregulation of YKL-40 Promotes Metastatic Phenotype and Correlates with Poor Prognosis and Therapy Response in Patients with Colorectal Cancer
Source: MDPI journal article supplement (doi:10.3390/cells11223568), 2022-11-11
Supplement: s1 [file s1]

**Supplementary Table S5 - Clinical characteristics of YKL-40<sub>high</sub> and YKL-40<sub>low</sub> patients in cohort 1 to 6.**

| Cohort 1 GSE14333 (N = 226) |                             |                              |         |
|-----------------------------|-----------------------------|------------------------------|---------|
|                             | YKL-40 low<br>N=199 (88.1%) | YKL-40 high<br>N=27 (11.9%)  | p-value |
| Gender <sup>a</sup>         |                             |                              |         |
| Male                        | 106 (53.3%)                 | 14 (51.9%)                   | 1       |
| Female                      | 93 (46.7%)                  | 13 (48.1%)                   |         |
| Age (mean) <sup>b</sup>     | 65.6                        | 69.4                         | 0.15    |
| Stage <sup>a</sup>          |                             |                              |         |
| I                           | 40 (20.1%)                  | 1 (3.7%)                     | 0.07    |
| II                          | 79 (39.7%)                  | 15 (55.6%)                   |         |
| III                         | 80 (40.2%)                  | 11 (40.7%)                   |         |
| Location <sup>a</sup>       |                             |                              |         |
| Proximal R                  | 88 (44.2%)                  | 13 (48.2%)                   | 0.63    |
| Distal L                    | 84 (42.2%)                  | 9 (33.3%)                    |         |
| Rectum                      | 25 (12.6%)                  | 5 (18.5%)                    |         |
| Unknown                     | 2 (1%)                      | 0                            |         |
| Cohort 2 GSE37892 (N = 130) |                             |                              |         |
|                             | YKL-40 low<br>N=64 (49.2%)  | YKL-40 high<br>N=66 (50.8%)  | p-value |
| Gender <sup>a</sup>         |                             |                              |         |
| Male                        | 36 (56.3%)                  | 33 (50%)                     | 1       |
| Female                      | 28 (43.7%)                  | 33 (50%)                     |         |
| Age (mean) <sup>b</sup>     | 69.2                        | 67.3                         | 0.38    |
| Stage <sup>a</sup>          |                             |                              |         |
| I                           | 0                           | 0                            | 0.29    |
| II                          | 39 (60.9%)                  | 34 (51.5%)                   |         |
| III                         | 25 (39.1%)                  | 32 (48.5%)                   |         |
| Location <sup>a</sup>       |                             |                              |         |
| Proximal R                  | 28 (43.8%)                  | 29 (43.9%)                   | 1       |
| Distal L                    | 36 (56.2%)                  | 36 (54.6%)                   |         |
| Rectum                      | 0                           | 0                            |         |
| Unknown                     | 0                           | 1 (1.5%)                     |         |
| Cohort 3 GSE41258 (N=128)   |                             |                              |         |
|                             | YKL-40 low<br>N=14 (10.9%)  | YKL-40 high<br>N=114 (89.1%) | p-value |
| Gender <sup>a</sup>         |                             |                              |         |
| Male                        | 7 (50%)                     | 58 (50.9%)                   | 1       |
| Female                      | 7 (50%)                     | 56 (49.1%)                   |         |
| Age (mean) <sup>b</sup>     | 57.7                        | 65.9                         | 0.06    |
| Stage <sup>a</sup>          |                             |                              |         |
| I                           | 4 (28.6%)                   | 24 (21%)                     | 0.82    |
| II                          | 5 (35.7%)                   | 46 (40.4%)                   |         |
| III                         | 5 (35.7%)                   | 44 (38.6%)                   |         |
| IV                          | 0                           | 0                            |         |

| Location <sup>a</sup> |           |            |      |
|-----------------------|-----------|------------|------|
| Proximal R            | 5 (35.7%) | 47 (41.2%) | 0.91 |
| Distal L              | 8 (57.1%) | 58 (50.9%) |      |
| Rectum                | 1 (7.2%)  | 9 (7.9%)   |      |
| Unknown               | 0         | 0          |      |

#### Cohort 4 GSE40967 (N=585)

|                     | YKL-40 low<br>N=524 (89.6%) | YKL-40 high<br>N=61 (10.4%) | p-value |
|---------------------|-----------------------------|-----------------------------|---------|
| Gender <sup>a</sup> |                             |                             |         |
| Male                | 286 (54.6%)                 | 36                          | 0.58    |
| Female              | 238 (45.4%)                 | 25                          |         |

|                         |      |      |      |
|-------------------------|------|------|------|
| Age (mean) <sup>b</sup> | 66.9 | 66.6 | 0.81 |
|-------------------------|------|------|------|

| Stage <sup>a</sup> |             |            |      |
|--------------------|-------------|------------|------|
| 0                  | 3 (0.6%)    | 1 (1.6%)   | 0.68 |
| I                  | 36 (6.9%)   | 2 (3.3%)   |      |
| II                 | 242 (46.2%) | 29 (47.5%) |      |
| III                | 186 (35.5%) | 24 (39.4%) |      |
| IV                 | 55 (10.5%)  | 5 (8.2%)   |      |
| Unknown            | 2 (0.3%)    | 0          |      |

| Location <sup>a</sup> |             |            |      |
|-----------------------|-------------|------------|------|
| Proximal R            | 211 (40.3%) | 21 (34.4%) | 0.53 |
| Distal L              | 311 (59.3%) | 40 (65.6%) |      |
| Rectum                | 0           | 0          |      |
| Unknown               | 2 (0.4%)    | 0          |      |

| KRAS status <sup>a</sup> |             |            |      |
|--------------------------|-------------|------------|------|
| Wild type                | 291 (55.5%) | 37 (60.7%) | 0.58 |
| Mutant                   | 198 (37.8%) | 19 (31.1%) |      |
| Unknown                  | 35 (6.7%)   | 5 (8.2%)   |      |

#### Cohort 5 GSE5851 (N = 80)

|                     | YKL-40 low<br>N=18 (22.5%) | YKL-40 high<br>N=62 (77.5%) | p-value |
|---------------------|----------------------------|-----------------------------|---------|
| Gender <sup>a</sup> |                            |                             |         |
| Male                | 8 (44.4%)                  | 36 (58%)                    | 0.42    |
| Female              | 10 (55.6%)                 | 26 (42%)                    |         |

|                         |      |      |      |
|-------------------------|------|------|------|
| Age (mean) <sup>b</sup> | 61.5 | 60.7 | 0.86 |
|-------------------------|------|------|------|

| KRAS status <sup>a</sup> |         |          |      |
|--------------------------|---------|----------|------|
| WT                       | 9 (50%) | 44 (71%) | 0.16 |
| Mutant                   | 9 (50%) | 18 (29%) |      |
| Unknown                  | 0       | 0        |      |

#### Cohort 6 TCGA (N=387)

|                     | YKL-40 low<br>N=60 (15.5%) | YKL-40 high<br>N=327 (84.5%) | p-value |
|---------------------|----------------------------|------------------------------|---------|
| Gender <sup>a</sup> |                            |                              |         |
| Male                | 30 (50%)                   | 178 (54.4%)                  | 0.57    |

|                                |            |             |       |
|--------------------------------|------------|-------------|-------|
| Female                         | 30 (50%)   | 149 (45.6%) |       |
| <b>Age (mean)<sup>b</sup></b>  | 65.2       | 68.4        | 0.09  |
| <b>Stage<sup>a</sup></b>       |            |             |       |
| I                              | 8 (13.3%)  | 56 (17.1%)  | 0.67  |
| II                             | 21 (35%)   | 130 (39.8%) |       |
| III                            | 18 (30%)   | 86 (26.3%)  |       |
| IV                             | 10 (16.7%) | 47 (14.4%)  |       |
| Unknown                        | 3 (5%)     | 8 (2.4%)    |       |
| <b>KRAS status<sup>a</sup></b> |            |             |       |
| WT                             | 8 (13.3%)  | 12 (3.7%)   | 0.008 |
| Mutant                         | 3 (5%)     | 12 (3.7%)   |       |
| Unknown                        | 49 (81.7%) | 303 (92.6%) |       |

<sup>a</sup>  $\chi^2$ -test

<sup>b</sup> t-test
