# Supplementary material for: Upregulation of YKL-40 Promotes Metastatic Phenotype and Correlates with Poor Prognosis and Therapy Response in Patients with Colorectal Cancer
Source: MDPI journal article supplement (doi:10.3390/cells11223568), 2022-11-11
Supplement: s1 [file s1]

**Supplementary Table S6** - Univariate and multivariate analysis of factors affecting DFS in stage I–III patients (cohort 1) and RFS in stage I-IV patients (cohort 4).

| <b>Cohort 1 GSE14333 (N = 226)</b> |                                        |                    |                |                                          |                |                |
|------------------------------------|----------------------------------------|--------------------|----------------|------------------------------------------|----------------|----------------|
| <b>Variables</b>                   | <b>Univariate analysis<sup>a</sup></b> |                    |                | <b>Multivariate analysis<sup>b</sup></b> |                |                |
|                                    | <b>N</b>                               | <b>5-Years DFS</b> | <b>P-value</b> | <b>HR</b>                                | <b>95% CI</b>  | <b>P-value</b> |
| <b>Age</b>                         |                                        |                    | 0.2            |                                          |                |                |
| <70 y                              | 125                                    | 55.3%              |                | –                                        | –              | –              |
| >= 70 y                            | 101                                    | 44.7%              |                | –                                        | –              | –              |
| <b>Gender</b>                      |                                        |                    | 0.7            |                                          |                |                |
| Female                             | 106                                    | 46.9%              |                | –                                        | –              | –              |
| Male                               | 120                                    | 53.1%              |                | –                                        | –              | –              |
| <b>Location</b>                    |                                        |                    | 0.6            |                                          |                |                |
| Left                               | 101                                    | 44.69%             |                | –                                        | –              | –              |
| Rectum                             | 30                                     | 13.27%             |                | –                                        | –              | –              |
| Right                              | 93                                     | 41.5%              |                | –                                        | –              | –              |
| Unknown                            | 2                                      | 0.88%              |                | –                                        | –              | –              |
| <b>Adjuvant chemotherapy</b>       |                                        |                    | <b>0.02</b>    |                                          |                |                |
| Done                               | 87                                     | 38.5%              |                | 0.79                                     | (0.41 – 1.52)  | 0.48           |
| Undone                             | 139                                    | 61.5%              |                | 1                                        | –              | –              |
| Unknown                            | 0                                      | 0%                 |                |                                          |                |                |
| <b>Stage</b>                       |                                        |                    | <b>0.00005</b> |                                          |                |                |
| I                                  | 41                                     | 18.14%             |                | 1                                        | –              | –              |
| II                                 | 94                                     | 41.59%             |                | 3.23                                     | (0.75 – 14.76) | 0.11           |
| III                                | 91                                     | 40.27%             |                | 11.28                                    | (2.52 – 50.43) | <b>0.0015</b>  |
| IV                                 | 0                                      | 0%                 |                |                                          |                |                |
| <b>Ykl-40 Expression</b>           |                                        |                    | <b>0.024</b>   |                                          |                |                |
| High                               | 27                                     | 11.9%              |                | 1                                        | –              | 0.0095         |
| Low                                | 199                                    | 88.1%              |                | 0.4                                      | (0.19 – 0.85)  | <b>0.0172</b>  |

<sup>a</sup> In univariate analyses, log-rank tests were conducted.

<sup>b</sup> In the multivariate Cox proportional hazard model, only variables with P < 0.15 in univariate analysis were included and the "enter method" was applied.

| Cohort 4 GSE40967 (N = 585)  |                                  |             |         |                                    |                |         |
|------------------------------|----------------------------------|-------------|---------|------------------------------------|----------------|---------|
| Variables                    | Univariate analysis <sup>a</sup> |             |         | Multivariate analysis <sup>b</sup> |                |         |
|                              | N                                | 5-Years DFS | P-value | HR                                 | 95% CI         | P-value |
| <b>Age<sup>c</sup></b>       |                                  |             | 0.4     |                                    |                |         |
| <70 y                        | 309                              | 55.3%       |         | —                                  | —              | —       |
| >= 70 y                      | 264                              | 44.7%       |         | —                                  | —              | —       |
| <b>Gender</b>                |                                  |             | 0.1     |                                    |                |         |
| Female                       | 257                              | 46.9%       |         | 0.69                               | (0.51 – 0.94)  | 0.02    |
| Male                         | 317                              | 53.1%       |         | 1                                  | —              | —       |
| <b>Location<sup>d</sup></b>  |                                  |             | 0.1     |                                    |                |         |
| Left                         | 226                              | 44.69%      |         | 1                                  | —              | —       |
| Rectum                       | 0                                | 13.27%      |         | —                                  | —              | —       |
| Right                        | 348                              | 41.5%       |         | 1.27                               | (0.93 – 1.75)  | 0.132   |
| Unknown                      | 0                                | 0.88%       |         | —                                  | —              | —       |
| <b>Adjuvant chemotherapy</b> |                                  |             | <0.0001 |                                    |                |         |
| Done                         | 239                              | 38.5%       |         | 1                                  | —              | —       |
| Undone                       | 319                              | 61.5%       |         | 0.99                               | (0.69 – 1.43)  | 0.96    |
| Unknown                      | 16                               | 0%          |         | 18.76                              | (8.62 – 40.84) | <0.0001 |
| <b>Stage</b>                 |                                  |             | <0.0001 |                                    |                |         |
| I                            | 4                                | 0.7%        |         | 1                                  | —              | —       |
| I                            | 37                               | 6.3%        |         | 11.65                              | —              | 0.99    |
| II                           | 267                              | 45.6%       |         | 13.85                              | —              | 0.99    |
| III                          | 206                              | 35.2%       |         | 14.52                              | —              | 0.99    |
| IV                           | 60                               | 10.3%       |         | 15.55                              | —              | 0.99    |
| <b>YKL-40 Expression</b>     |                                  |             | 0.079   |                                    |                |         |
| High                         | 27                               | 10.2%       |         | 1                                  | —              | 0.0095  |
| Low                          | 199                              | 87.9%       |         | 1.63                               | (0.92 – 2.87)  | 0.0918  |

<sup>a</sup> In univariate analyses, log-rank tests were conducted.

<sup>b</sup> In the multivariate Cox proportional hazard model, only variables with P < 0.15 in univariate analysis were included and the "enter method" was applied.

<sup>c</sup> Data on age of 11 patients were missing.

<sup>d</sup> Data on location of 11 patients were missing.
