# Supplementary material for: Upregulation of YKL-40 Promotes Metastatic Phenotype and Correlates with Poor Prognosis and Therapy Response in Patients with Colorectal Cancer
Source: MDPI journal article supplement (doi:10.3390/cells11223568), 2022-11-11
Supplement: s1 [file s1]

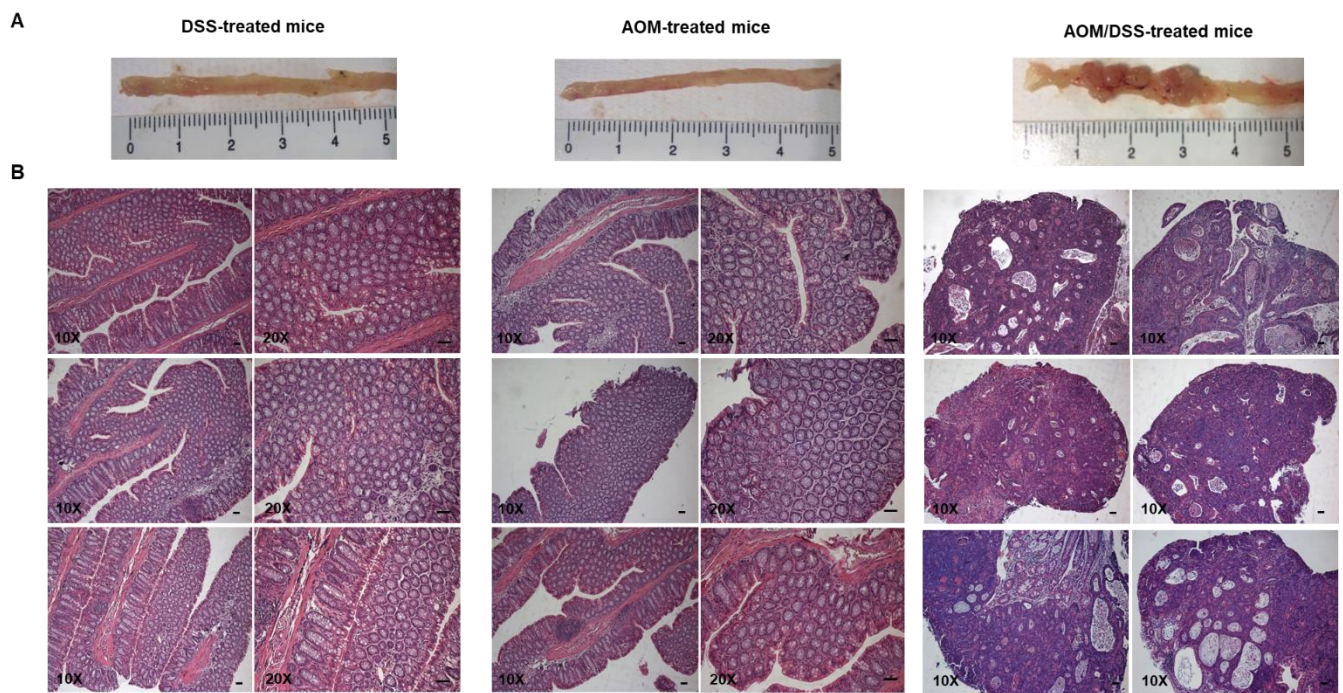

**Supplementary Figure S2. A)** Macroscopic observation of the distal regions of colons from DSS-, AOM- and AOM/DSS-treated mice at the end of the 12<sup>th</sup> week (1 colon per group is shown). Evident macroscopic lesions detectable only in AOM/DSS-treated colons. **B)** Hematoxylin/eosin staining of tumors and normal colons. Colon mucosae of AOM-only and DSS-only treated mice show normal histological characteristics. Adenocarcinomas with a high degree of dysplasia are detectable in AOM/DSS-treated mice. 20x original magnification. Scale bars, 50  $\mu$ m.
