# Supplementary material for: Upregulation of YKL-40 Promotes Metastatic Phenotype and Correlates with Poor Prognosis and Therapy Response in Patients with Colorectal Cancer
Source: MDPI journal article supplement (doi:10.3390/cells11223568), 2022-11-11
Supplement: s1 [file s1]

**Supplementary Table S7** - Univariate and multivariate analysis of factors affecting PFS in patients who received Cetuximab monotherapy (cohort 5).

| <b>Cohort 5 GSE5851 (N = 80)</b> |                                        |            |                |                                          |               |                |
|----------------------------------|----------------------------------------|------------|----------------|------------------------------------------|---------------|----------------|
| <b>Variables</b>                 | <b>Univariate analysis<sup>a</sup></b> |            |                | <b>Multivariate analysis<sup>b</sup></b> |               |                |
|                                  | <b>N</b>                               | <b>PFS</b> | <b>P-value</b> | <b>HR</b>                                | <b>95% CI</b> | <b>P-value</b> |
| <b>Age<sup>c</sup></b>           |                                        |            | 0.2            |                                          |               |                |
| <70 y                            | 54                                     | 67.5%      |                | —                                        | —             | —              |
| ≥ 70 y                           | 24                                     | 32.5%      |                | —                                        | —             | —              |
| <b>Gender**</b>                  |                                        |            | <b>0.009</b>   | 1.542                                    | 0.9408–2.526  | 0.0858         |
| Female                           | 36                                     | 45%        |                | 1                                        | —             | —              |
| Male                             | 44                                     | 55%        |                | —                                        | —             | —              |
| <b>YKL-40 Expression</b>         |                                        |            |                |                                          |               |                |
| High                             | 62                                     | 77.5%      | <b>0.005</b>   | 1                                        | —             | —              |
| Low                              | 18                                     | 22.5%      |                | 1.920                                    | 1.0747–3.429  | <b>0.0276</b>  |
| <b>EGFR Expression</b>           |                                        |            |                |                                          |               |                |
| High                             | 62                                     | 53.7%      | <b>0.018</b>   | 1                                        | —             | —              |
| Low                              | 18                                     | 46.3%      |                | 1.714                                    | 1.0678–2.750  | —              |
| <b>KRAS Mutation</b>             |                                        |            | 0.2            |                                          |               |                |
| High                             | 27                                     | 33.8%      |                | —                                        | —             | —              |
| Low                              | 53                                     | 66.2%      |                | —                                        | —             | —              |

a In univariate analyses, log-rank tests were conducted.

b In the multivariate Cox proportional hazard model, only variables with  $P < 0.15$  in univariate analysis were included and the "enter method" was applied.

c Data on age of two patients were missing.
