# Supplementary material for: Upregulation of YKL-40 Promotes Metastatic Phenotype and Correlates with Poor Prognosis and Therapy Response in Patients with Colorectal Cancer
Source: Cells. 2022 Nov 11;11(22):3568. doi: 10.3390/cells11223568 (PMC9688424; doi:10.3390/cells11223568)
Supplement: Supplementary file 1 [file cells-11-03568-s001.zip]

Archive with 9 entries (9 files):
- Supplementary Figure S1.pdf
- Supplementary Figure S2.pdf
- Supplementary Table S1.pdf
- Supplementary Table S2.xlsx
- Supplementary Table S3.pdf
- Supplementary Table S4.pdf
- Supplementary Table S5.pdf
- Supplementary Table S6.pdf
- Supplementary Table S7.pdf
