# Supplementary material for: Upregulation of YKL-40 Promotes Metastatic Phenotype and Correlates with Poor Prognosis and Therapy Response in Patients with Colorectal Cancer
Source: Cells. 2022 Nov 11;11(22):3568. doi: 10.3390/cells11223568 (PMC9688424; doi:10.3390/cells11223568)
Supplement: Supplementary file 1 [file cells-11-03568-s001.zip › Supplementary Table S2.xlsx]

## Sheet: Patients
Samples	Age	Sex	Histology	Tumor Location	Grade	TNM	Metastasis	Stage
1	68	F	Adenocarcinoma	Sigmoid colon	G2	T2N0M0
2	79	M	Adenocarcinoma	Cecum	G5	T2N0M1
3	86	M	Adenocarcinoma	Rectum	G2	T1NxM0
4	66	M	Adenocarcinoma	Recto-sigmoid colon	G2	T2NxM0
5	77	M	Adenocarcinoma	Sigmoid colon	G2	T2N0M0
6	75	F	Adenocarcinoma	Sigmoid colon	G2	T2N0M0
7	61	F	Adenocarcinoma	Rectum	G2	T3N0M0
8	81	M	Adenocarcinoma	Rectum	G2	T4N0M0-1	YES
9	64	M	Adenocarcinoma	Rectum	G2	T3N0M0
10	74	M	Adenocarcinoma	Transverse colon	G3	T3N0M0
11	70	M	Adenocarcinoma	Sigmoid colon	G1	T2N0M0
12	61	F	Adenocarcinoma	flexura coli hepatica	G2	T4N0M0
13	75	F	Adenocarcinoma	Descending colon	G2	T4N0M0
14	66	F	Adenocarcinoma	Rectum	G2	T3N0M0
15	76	M	Adenocarcinoma	Rectum	G2	T3N0M0
16	80	M	Adenocarcinoma	Rectum	G2	T3N1M0
17	77	F	Adenocarcinoma	Recto-sigmoid colon	G2	T3N0M0
18	68	M	Adenocarcinoma	Rectum	G2	T3N0M0
19	77	M	Adenocarcinoma	flexura coli lienalis	G2	T4N2M0
20	70	F	Adenocarcinoma	Recto-sigmoid colon	G2	T3N0M1	yes
21	89	F	Adenocarcinoma	Rectum	G2	T4N2M0
22	83	F	Adenocarcinoma	Descending colon	G2	T3N0M0
23	74	M	Adenocarcinoma	Sigmoid colon	G2	T3NxMx		IIA
24	82	M	Adenocarcinoma	Ascending colon	G1	T1sNxMx		0
25	65	F	Adenocarcinoma	Cecum	G2	T3NxMx		IIA
26	63	M	Adenocarcinoma	Sigmoid colon	G2	T3N1bM1	1 Liver	IVA
27	66	F	Adenocarcinoma	Ascending colon	G2	T3NxMx		IIA
28	75	M	Adenocarcinoma	Cecum	G3	T3N1bMx		IIIB
29	59	F	Adenocarcinoma	Sigmoid colon	G2	T3NxMx		IIA
30	62	M	Adenocarcinoma	Cecum	G2	T3N1bM1	1 Liver	IVA
31	70	M	Adenocarcinoma	Recto-sigmoid colon	G2	T3N1aMx		IIIB
32	69	F	Adenocarcinoma	Sigmoid colon	G2	T3N0Mx		IIA
33	73	F	Adenocarcinoma	Cecum	G2	T3N0Mx		IIA
34	80	F	Adenocarcinoma	Cecum	G2	T4bN0Mx		IIC
35	48	M	Adenocarcinoma	Cecum	G2	T3N0Mx		IIIB
36	59	F	Adenocarcinoma	Ascending colon	G2	T3N2aMx		IIIB
37	81	F	Adenocarcinoma	Cecum	G2	T3N0Mx		IIA
38	77	M	Adenocarcinoma	Rectum	G3	T3NxM1	1 Liver	IVA
39	71	F	Adenocarcinoma	Ascending colon	G2	T3N0M1	1 Lung	IVA
40	77	M	Adenocarcinoma	Sigmoid colon	G2	T3N0Mx		/
41	79	M	Adenocarcinoma	Transverse colon	G2	T3N0Mx		IIA
42	60	M	Adenocarcinoma	Descending colon	G2	T4aN0M1	yes	IVA
43	48	M	Adenocarcinoma	Cecum	G2	T3N0Mx		/

## Sheet: Healty subjects
Samples	Age	Sex	Histology
1	40	F	Normal colon mucosa
2	56	M	Normal colon mucosa
3	77	M	Normal colon mucosa
4	31	M	Normal colon mucosa
5	64	M	Normal colon mucosa
6	53	M	Normal colon mucosa
7	48	M	Normal colon mucosa
8	33	M	Normal colon mucosa
9	54	M	Normal colon mucosa
10	83	F	Normal colon mucosa
11	70	F	Normal colon mucosa
12	59	F	Normal colon mucosa
13	62	F	Normal colon mucosa
14	72	F	Normal colon mucosa
15	77	F	Normal colon mucosa
16	87	M	Normal colon mucosa
17	56	M	Normal colon mucosa
18	53	M	Normal colon mucosa
19	53	M	Normal colon mucosa
20	53	M	Normal colon mucosa
21	43	F	Normal colon mucosa
22	68	M	Normal colon mucosa
23	61	M	Normal colon mucosa
24	53	M	Normal colon mucosa
25	74	M	Normal colon mucosa
26	44	F	Normal colon mucosa
27	64	F	Normal colon mucosa
28	49	M	Normal colon mucosa
29	50	M	Normal colon mucosa
30	54	F	Normal colon mucosa
31	56	F	Normal colon mucosa
32	44	F	Normal colon mucosa
33	63	F	Normal colon mucosa
34	50	F	Normal colon mucosa
35	18	F	Normal colon mucosa
36	50	F	Normal colon mucosa
37	22	F	Normal colon mucosa
38	25	F	Normal colon mucosa
39	24	F	Normal colon mucosa
40	41	F	Normal colon mucosa
41	40	F	Normal colon mucosa
42	50	F	Normal colon mucosa
43	39	F	Normal colon mucosa
44	22	F	Normal colon mucosa
